# Supplementary material for: The impact of high apparent temperature on spontaneous preterm delivery: a case-crossover study
Source: PubMed Central journal article supplement (PMC5286689; doi:10.1186/s12940-017-0209-5), 2017-02-01

Supplemental Figure 1. Map of Temperature Monitors in Northern California Counties Represented in the Study

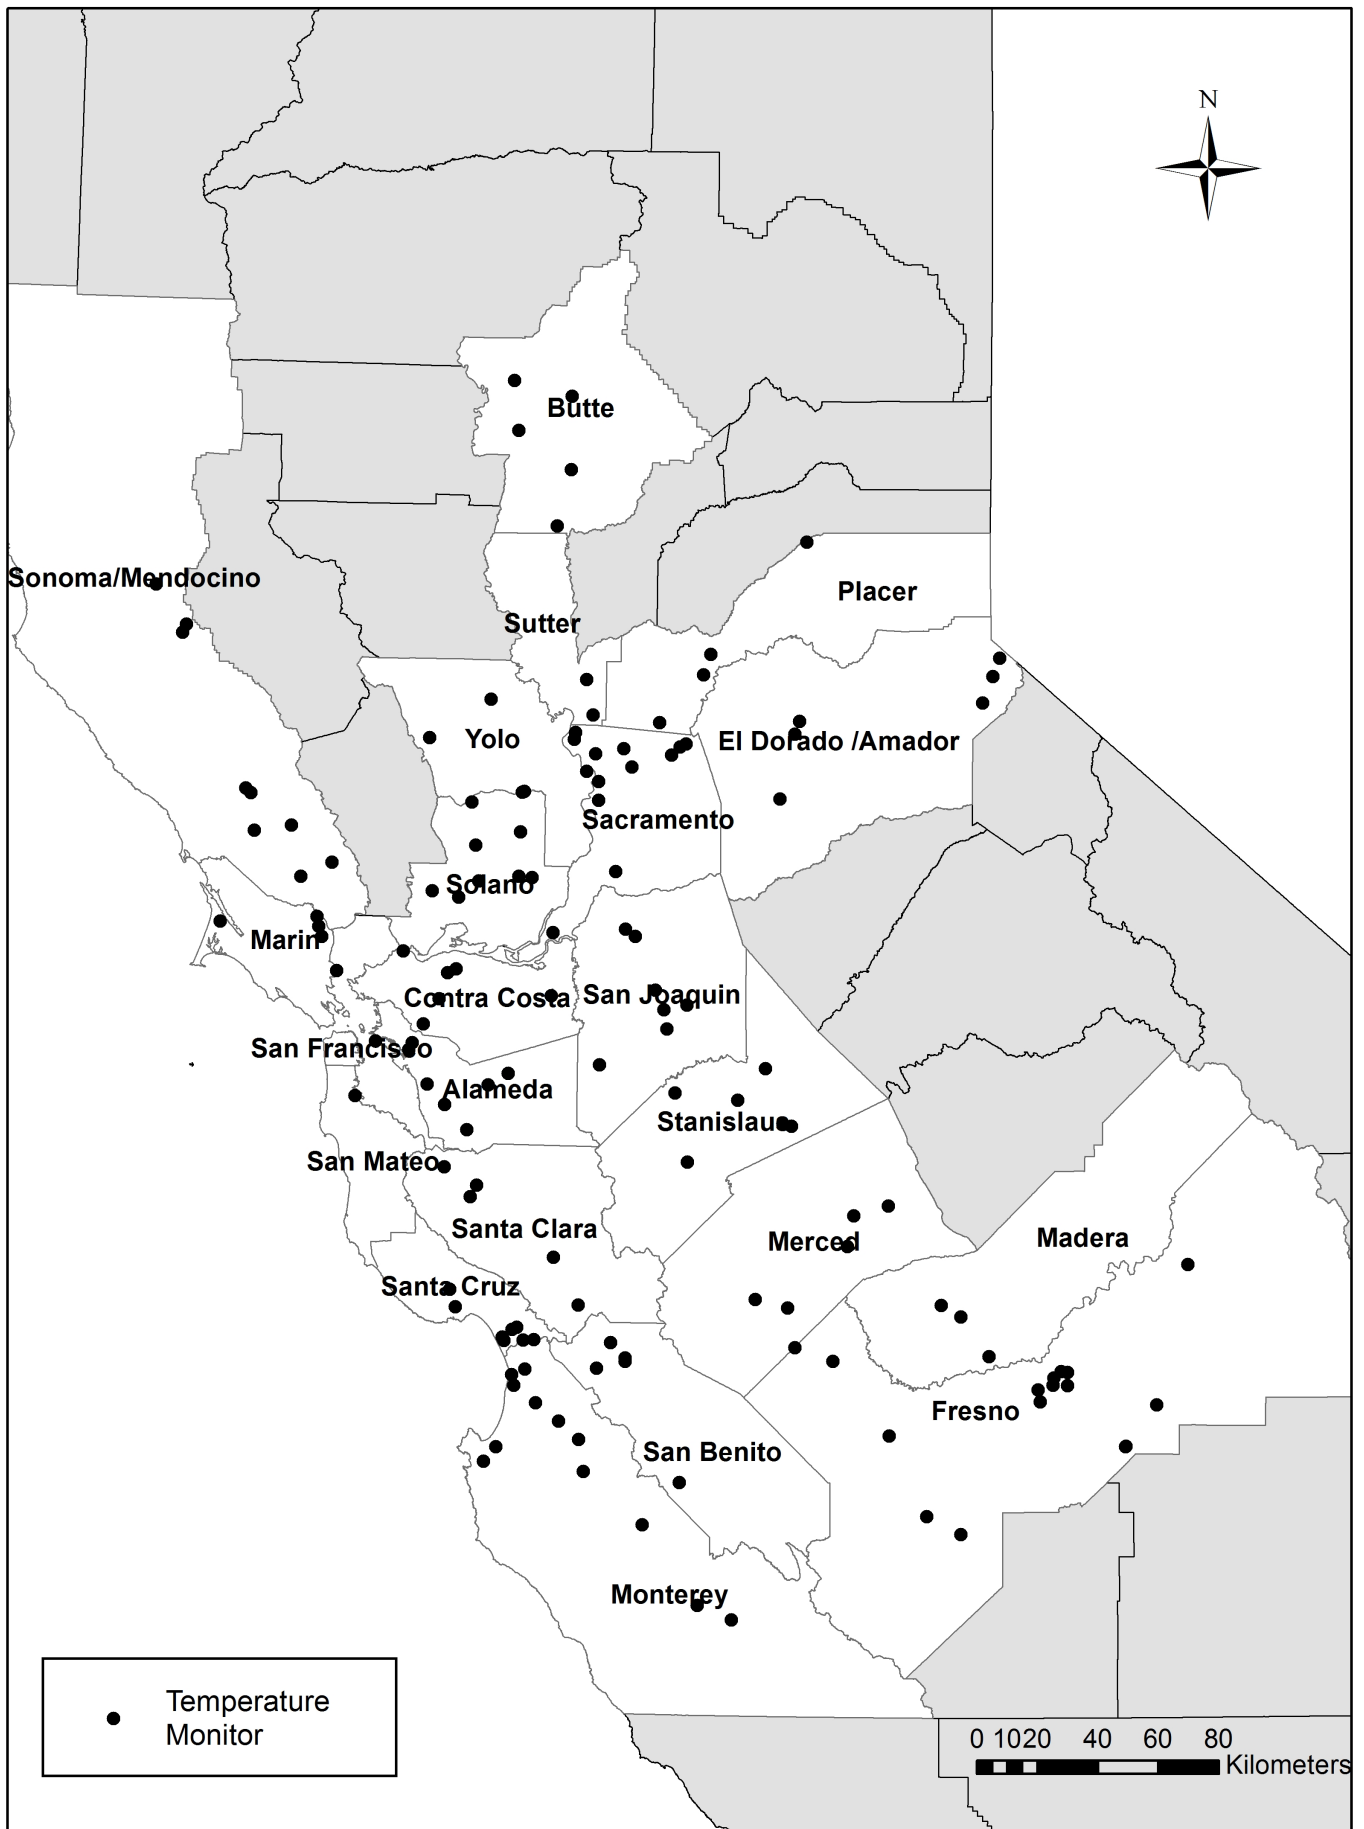

Supplement: 12940_2017_209_MOESM1_ESM.pdf [file 12940_2017_209_MOESM1_ESM.pdf]
